# Supplementary material for: A comparative study of enzymatic hydrolysis and thermal degradation of corn stover: understanding biomass pretreatment
Source: Royal Society of Chemistry journal article supplement (doi:10.1039/c5ra01930c), 2015-01-01
Supplement: c5ra01930c1.pdf [file c5ra01930c1.pdf]

## Supporting Information

### **A Comparative Study of Enzymatic Hydrolysis and Thermal Degradation of Corn Stover: Understanding Biomass Pretreatment**

Jiafu Zhang<sup>c†</sup>, Xin Zhang<sup>b†</sup>, Wenyu Zhang<sup>b</sup>, Chi Li<sup>b</sup>, Jingkun Zhang<sup>b</sup>, Ruihong Zhang<sup>c,d</sup>, Qipeng Yuan<sup>b</sup>, Guangqing Liu<sup>c</sup>, Gang Cheng<sup>a,b\*</sup>

<sup>a</sup> Beijing Key Laboratory of Bioprocess , Beijing University of Chemical Technology, Beijing 100029, China

<sup>b</sup> College of Life science and Technology, Beijing University of Chemical Technology, Beijing 100029, China

<sup>c</sup> Biomass Energy and Environmental Engineering Research Center, Beijing University of Chemical Technology, Beijing 100029, China

<sup>d</sup> Department of Biological and Agricultural Engineering, University of California, Davis, CA 95616, USA

† Those authors contribute equally to this work

\*Corresponding author. Tel.:+86 13693276690 (Gang Cheng), E-mail addresses:

[chenggang@mail.buct.edu.cn](mailto:chenggang@mail.buct.edu.cn) (Gang Cheng)

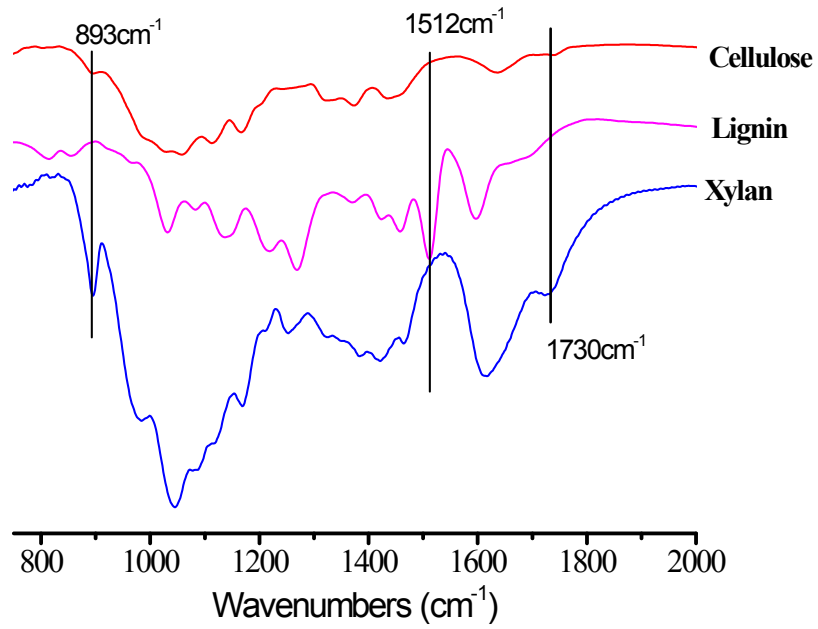

FTIR of cellulose (Avicel), xylan from beech wood and alkaline lignin

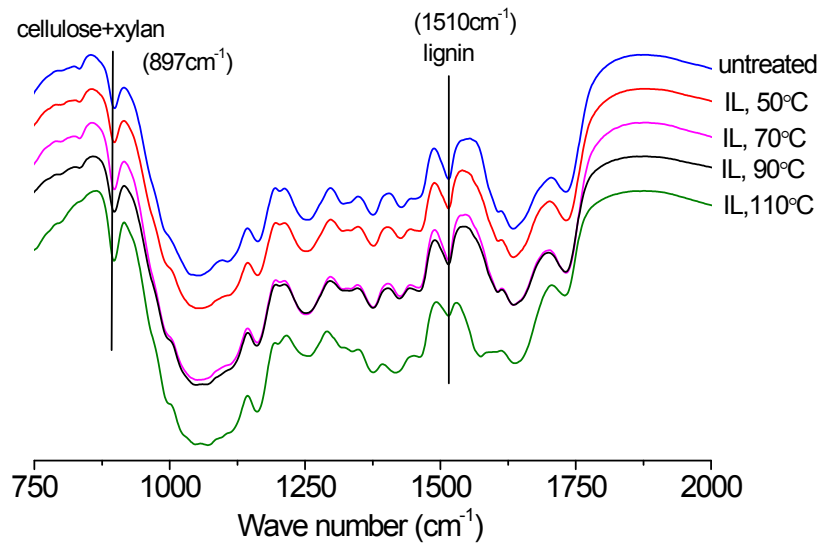

FTIR of IL pretreated corn stover samples

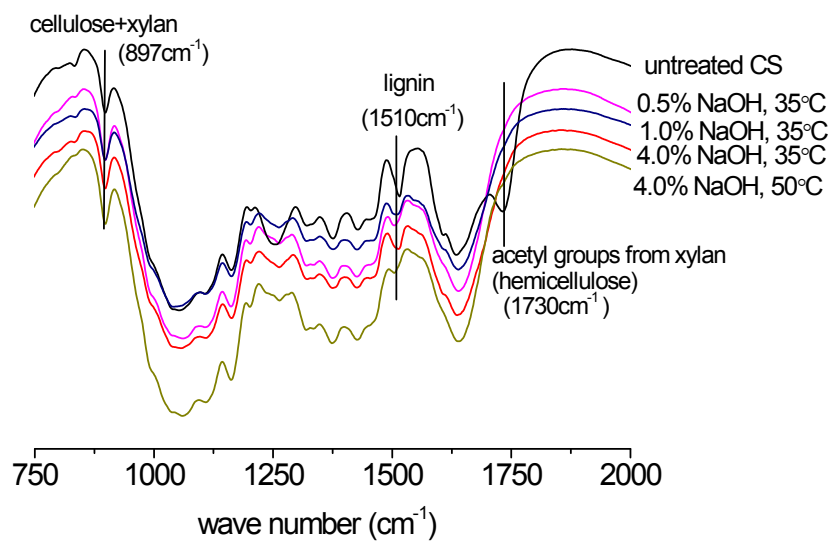

FTIR of NaOH pretreated corn stover samples
